# Supplementary material for: Cross-Sectional Association Between Types of Leisure Activities and Self-rated Health According to Gender and Work Status Among Older Japanese Adults
Source: PubMed Central journal article supplement (PMC6776474; doi:10.2188/jea.je20180108), 2019-11-05
Supplement: je-29-424-s001.pdf [file je-29-424-s001.pdf]

## Supplementary data

**eTable 1.** List of leisure activities

| Type of leisure activities | Examples                                                                                                             |
|----------------------------|----------------------------------------------------------------------------------------------------------------------|
| Sports activities          | Walking, jogging, swimming, golf, tennis, gymnastics, dancing, yoga                                                  |
| Gardening                  | Home vegetable garden, horticulture, flower-growing, growing of a crop                                               |
| Musical activities         | Playing a music instrument, singing in a choir, singing a Japanese folk song, a Chinese poem, and/or karaoke music   |
| Creative activities        | Handicraft, ceramics, painting, photography, home carpentry                                                          |
| Cultural activities        | Reading books, learning, composing poems, enjoying flower arrangement, tea ceremony, and calligraphy                 |
| Playing games              | Playing Go, Japanese chess, and mah-jongg                                                                            |
| Sightseeing                | Domestic travel, overseas travel, going on a trip by car, visiting shrines, temples, and/or historical sites         |
| Art appreciation           | Appreciating music and drama, going to the movie and the theater, looking at pictures and fine art, visiting museums |
| TV watching                | Watching a TV program and a video tape, listening to the radio                                                       |
| Cooking                    | Making meals and confectionery (a tour of restaurants is not included)                                               |
| Pet ownership              | Owning and looking after a pet                                                                                       |
| Technology usage           | Using information and communication technology (ICT) such as the Internet, e-mails, and mobile/smart phones          |
| Investment                 | Investing in stocks, bonds, immovables, and/or exchange                                                              |
| Gambling                   | Horse racing, speedboat racing, pachinko (i.e., Japanese pinball), public lottery                                    |

## **eAppendix 1.** Detailed explanations of covariates and multiple imputations

### **Covariates**

Age was categorized as 65–69, 70–74, 75–79, and  $\geq 80$  years. Marital status was categorized as either currently married or not married. Education was categorized as high (junior college or higher), middle (high school), and low (junior high school). Subjective economic status was categorized as rich (very rich/rich), fair, and poor (poor/very poor). BMI ( $\text{kg}/\text{m}^2$ ) was categorized as normal (18.5 to  $<25.0$ ), underweight ( $<18.5$ ), and overweight ( $\geq 25.0$ ). Information on chronic diseases included hypertension, hyperlipidemia, diabetes mellitus, cardiovascular disease, cerebrovascular diseases, and cancer. The number of chronic diseases was categorized as zero, one, and  $\geq$ two. Alcohol intake was categorized as daily/occasional drinker and non/social drinker. Smoking history was categorized as ex/current smoker and never-smoker. Waking time per day was categorized as  $\geq 1$  hour and  $<1$  hour. Depression was measured with the five-item short form of the Geriatric Depression Scale.<sup>1</sup> Cognitive functioning was measured with the Cognitive Performance Scale.<sup>2</sup>

### **Multiple imputations**

Using logistic regression, we created five sets of imputation data and performed

analyses on the complete pooled data set. The independent variable, outcome, gender, work status, and all the covariate variables were entered into the imputation procedure. For this study, there were no missing data on gender and age. Marital status (0.3% missing), education (0.8% missing), subjective economic status (0.2% missing), BMI (2.1% missing), chronic diseases (2.2% missing), alcohol intake (0.4% missing), smoking (0.8% missing), walking time (1.8% missing), depression (0.5% missing), and cognitive functioning (1.7% missing) were imputed as ordinal variables.

## **REFERENCES**

1. Hoyle MT, Alessi CA, Harker JO, et al. Development and testing of a five-item version of the Geriatric Depression Scale. *J Am Geriatr Soc.* 1999;47:873–878.
2. Morris JN, Fries BE, Mehr DR, et al. MDS Cognitive Performance Scale. *J Gerontol.* 1994;49:M174–182.

**eTable 2.** Characteristics of research subjects who responded to the questionnaire

|                                      | Men (n=4,044)      |                    | Women (n=4,617)  |                    |
|--------------------------------------|--------------------|--------------------|------------------|--------------------|
|                                      | Working            | Not working        | Working          | Not working        |
|                                      | (n=1,208)<br>n (%) | (n=2,836)<br>n (%) | (n=687)<br>n (%) | (n=3,930)<br>n (%) |
| <b>Socio-demographic factors</b>     |                    |                    |                  |                    |
| Age, years                           |                    |                    |                  |                    |
| 65–69                                | 616 (51.0)         | 664 (23.4)         | 405 (59.0)       | 1,174 (29.9)       |
| 70–74                                | 343 (28.4)         | 816 (28.8)         | 177 (25.8)       | 1,082 (27.5)       |
| 75–79                                | 162 (13.4)         | 755 (26.6)         | 77 (11.2)        | 848 (21.6)         |
| ≥80                                  | 87 (7.2)           | 601 (21.2)         | 28 (4.1)         | 826 (21.0)         |
| Marital status                       |                    |                    |                  |                    |
| Currently married                    | 1,105 (91.5)       | 2,494 (87.9)       | 443 (64.5)       | 2,460 (62.6)       |
| Not married                          | 102 (8.4)          | 336 (11.8)         | 238 (34.6)       | 1,459 (37.1)       |
| Missing                              | 1 (0.1)            | 6 (0.2)            | 6 (0.9)          | 11 (0.3)           |
| Education                            |                    |                    |                  |                    |
| High: junior college or higher       | 481 (39.8)         | 835 (29.4)         | 186 (27.1)       | 768 (19.5)         |
| Middle: high school                  | 511 (42.3)         | 1,327 (46.8)       | 370 (53.9)       | 2,155 (54.8)       |
| Low: junior high school or below     | 209 (17.3)         | 662 (23.3)         | 127 (18.5)       | 964 (24.5)         |
| Missing                              | 7 (0.6)            | 12 (0.4)           | 4 (0.6)          | 43 (1.1)           |
| Subjective economic status           |                    |                    |                  |                    |
| Rich: very rich/rich                 | 373 (30.9)         | 589 (20.8)         | 194 (28.2)       | 923 (23.5)         |
| Middle: fair                         | 650 (53.8)         | 1,623 (57.2)       | 346 (50.4)       | 2,271 (57.8)       |
| Poor: poor/very poor                 | 185 (15.3)         | 622 (21.9)         | 145 (21.1)       | 724 (18.4)         |
| Missing                              | 0 (0.0)            | 2 (0.1)            | 2 (0.3)          | 12 (0.3)           |
| <b>Health status</b>                 |                    |                    |                  |                    |
| Body mass index (kg/m <sup>2</sup> ) |                    |                    |                  |                    |
| Normal (18.5–24.9)                   | 856 (70.9)         | 2,036 (71.8)       | 505 (73.5)       | 2,687 (68.4)       |
| Underweight (<18.5)                  | 46 (3.8)           | 122 (4.3)          | 53 (7.7)         | 384 (9.8)          |
| Overweight (≥25.0)                   | 278 (23.0)         | 621 (21.9)         | 123 (17.9)       | 765 (19.5)         |
| Missing                              | 28 (2.3)           | 57 (2.0)           | 6 (0.9)          | 94 (2.4)           |
| Number of chronic diseases           |                    |                    |                  |                    |
| None                                 | 434 (35.9)         | 874 (30.8)         | 331 (48.2)       | 1,539 (39.2)       |
| One                                  | 509 (42.1)         | 1,212 (42.7)       | 243 (35.4)       | 1,586 (40.4)       |
| ≥Two                                 | 261 (21.6)         | 706 (24.9)         | 88 (12.8)        | 691 (17.6)         |
| Missing                              | 4 (0.3)            | 44 (1.6)           | 25 (3.6)         | 114 (2.9)          |

**eTable 2.** Continued

|                                                                                                  | Men (n=4,044)        |                          | Women (n=4,617)    |                          |
|--------------------------------------------------------------------------------------------------|----------------------|--------------------------|--------------------|--------------------------|
|                                                                                                  | Working<br>(n=1,208) | Not working<br>(n=2,836) | Working<br>(n=687) | Not working<br>(n=3,930) |
|                                                                                                  | n (%)                | n (%)                    | n (%)              | n (%)                    |
| <b>Health behaviors</b>                                                                          |                      |                          |                    |                          |
| Alcohol intake                                                                                   |                      |                          |                    |                          |
| Daily/occasional drinkers                                                                        | 831 (68.8)           | 1,711 (60.3)             | 248 (36.1)         | 1,047 (26.6)             |
| Non/social drinkers                                                                              | 374 (31.0)           | 1,116 (39.4)             | 437 (63.6)         | 2,860 (72.8)             |
| Missing                                                                                          | 3 (0.2)              | 9 (0.3)                  | 2 (0.3)            | 23 (0.6)                 |
| Smoking history                                                                                  |                      |                          |                    |                          |
| Ex/current smokers                                                                               | 886 (73.3)           | 2,074 (73.1)             | 91 (13.2)          | 344 (8.8)                |
| Never-smokers                                                                                    | 317 (26.2)           | 746 (26.3)               | 593 (86.3)         | 3,540 (90.1)             |
| Missing                                                                                          | 5 (0.4)              | 16 (0.6)                 | 3 (0.4)            | 46 (1.2)                 |
| Walking time per day                                                                             |                      |                          |                    |                          |
| 1 hour or more                                                                                   | 481 (39.8)           | 906 (31.9)               | 273 (39.7)         | 1,227 (31.2)             |
| Less than 1 hour                                                                                 | 718 (59.4)           | 1,881 (66.3)             | 400 (58.2)         | 2,615 (66.5)             |
| Missing                                                                                          | 9 (0.7)              | 49 (1.7)                 | 14 (2.0)           | 88 (2.2)                 |
| <b>Mental function</b>                                                                           |                      |                          |                    |                          |
| Depression measured by the five-item version of the Geriatric Depression Scale (score range 0–5) |                      |                          |                    |                          |
| No depression (0–1)                                                                              | 1,047 (86.7)         | 2,056 (72.5)             | 559 (81.4)         | 2,826 (71.9)             |
| Depression (2 or more)                                                                           | 156 (12.9)           | 769 (27.1)               | 126 (18.3)         | 1,077 (27.4)             |
| Missing                                                                                          | 5 (0.4)              | 11 (0.4)                 | 2 (0.3)            | 27 (0.7)                 |
| Cognitive functioning measured by the Cognitive Performance Scale (score range 0-6)              |                      |                          |                    |                          |
| Intact (0)                                                                                       | 1,045 (86.5)         | 2,192 (77.3)             | 620 (90.2)         | 3,197 (81.3)             |
| Poor (1 or more)                                                                                 | 153 (12.7)           | 606 (21.4)               | 51 (7.4)           | 649 (16.5)               |
| Missing                                                                                          | 10 (0.8)             | 38 (1.3)                 | 16 (2.3)           | 84 (2.1)                 |
| <b>Outcome indicator</b>                                                                         |                      |                          |                    |                          |
| Self-rated health measured by one item of the eight-item Short-Form Health Survey (SF-8)         |                      |                          |                    |                          |
| Excellent                                                                                        | 38 (3.1)             | 65 (2.3)                 | 18 (2.6)           | 73 (1.9)                 |
| Very good                                                                                        | 255 (21.1)           | 463 (16.3)               | 150 (21.8)         | 510 (13.0)               |
| Good                                                                                             | 712 (58.9)           | 1,580 (55.7)             | 398 (57.9)         | 2,187 (55.6)             |
| Fair                                                                                             | 168 (13.9)           | 582 (20.5)               | 99 (14.4)          | 914 (23.3)               |
| Poor                                                                                             | 29 (2.4)             | 106 (3.7)                | 16 (2.3)           | 173 (4.4)                |
| Very poor                                                                                        | 6 (0.5)              | 40 (1.4)                 | 6 (0.9)            | 73 (1.9)                 |

**eTable 3.** Comparison between the findings obtained from multiple imputation data and those from complete data, based on the mutual adjustment for all 14 types of leisure activities: stratified analyses by work status among men

| Type of leisure activities | Working men              |                          | Non-working men          |                          | All men                               |                                       |
|----------------------------|--------------------------|--------------------------|--------------------------|--------------------------|---------------------------------------|---------------------------------------|
|                            | MI data                  | Complete data            | MI data                  | Complete data            | MI data                               | Complete data                         |
|                            | n=1,208                  | n=1,154                  | n=2,836                  | n=2,638                  | n=4,044                               | n=3,792                               |
|                            | OR <sup>a</sup> (95% CI) | OR <sup>a</sup> (95% CI) | OR <sup>a</sup> (95% CI) | OR <sup>a</sup> (95% CI) | <i>P</i> for interaction <sup>b</sup> | <i>P</i> for interaction <sup>b</sup> |
| Sports activities          | <b>1.46 (1.07-2.00)</b>  | <b>1.55 (1.12-2.14)</b>  | <b>1.33 (1.04-1.69)</b>  | 1.27 (0.99-1.63)         | 0.555                                 | 0.323                                 |
| Gardening                  | 0.97 (0.73-1.31)         | 1.04 (0.77-1.40)         | 0.99 (0.80-1.22)         | 0.97 (0.78-1.20)         | 0.996                                 | 0.722                                 |
| Musical activities         | <b>1.44 (1.01-2.05)</b>  | <b>1.50 (1.04-2.15)</b>  | 0.96 (0.74-1.24)         | 0.96 (0.73-1.25)         | <b>0.046</b>                          | <b>0.038</b>                          |
| Creative activities        | 1.19 (0.77-1.83)         | 1.12 (0.72-1.75)         | 1.20 (0.91-1.58)         | 1.25 (0.94-1.66)         | 0.683                                 | 0.997                                 |
| Cultural activities        | 1.09 (0.74-1.60)         | 1.10 (0.74-1.64)         | 0.88 (0.68-1.14)         | 0.90 (0.69-1.17)         | 0.207                                 | 0.275                                 |
| Playing games              | 1.01 (0.70-1.45)         | 1.01 (0.70-1.46)         | 0.85 (0.66-1.09)         | 0.87 (0.67-1.12)         | 0.202                                 | 0.218                                 |
| Sightseeing                | 1.00 (0.72-1.39)         | 0.93 (0.67-1.30)         | 1.18 (0.93-1.50)         | 1.19 (0.93-1.52)         | 0.910                                 | 0.671                                 |
| Art appreciation           | 1.20 (0.85-1.71)         | 1.18 (0.82-1.70)         | 0.99 (0.77-1.27)         | 0.99 (0.76-1.28)         | 0.251                                 | 0.351                                 |
| TV watching                | 0.82 (0.59-1.13)         | 0.84 (0.60-1.17)         | 0.87 (0.69-1.10)         | 0.86 (0.67-1.10)         | 0.714                                 | 0.618                                 |
| Cooking                    | 0.89 (0.52-1.54)         | 0.89 (0.51-1.56)         | <b>1.65 (1.18-2.33)</b>  | <b>1.67 (1.17-2.37)</b>  | 0.149                                 | 0.148                                 |
| Pet ownership              | 0.85 (0.58-1.27)         | 0.82 (0.54-1.22)         | 0.87 (0.64-1.18)         | 0.89 (0.66-1.22)         | 0.914                                 | 0.705                                 |
| Technology usage           | <b>1.41 (1.01-1.96)</b>  | <b>1.53 (1.09-2.15)</b>  | 1.08 (0.86-1.37)         | 1.13 (0.89-1.44)         | 0.189                                 | 0.181                                 |
| Investment                 | 0.88 (0.61-1.29)         | 0.82 (0.56-1.21)         | 1.00 (0.77-1.31)         | 0.96 (0.73-1.27)         | 0.968                                 | 0.989                                 |
| Gambling                   | 0.79 (0.54-1.15)         | 0.80 (0.54-1.17)         | 0.86 (0.65-1.13)         | 0.84 (0.63-1.13)         | 0.756                                 | 0.851                                 |

CI, confidence interval; MI, multiple imputation; OR, odds ratio.

Non-participation in each activity was set as the reference group. Results in bold indicate  $P < 0.05$ .

<sup>a</sup>Adjusted for covariates, mental function, and all 14 leisure activity variables.

<sup>b</sup> $P$  for interaction between work status and each type of leisure activities.

**eTable 4.** Comparison between the findings obtained from multiple imputation data and those from complete data, based on the mutual adjustment for all 14 types of leisure activities: stratified analyses by work status among women

| Type of leisure activities | Working women            |                          | Non-working women        |                          | All women                             |                                       |
|----------------------------|--------------------------|--------------------------|--------------------------|--------------------------|---------------------------------------|---------------------------------------|
|                            | MI data                  | Complete data            | MI data                  | Complete data            | MI data                               | Complete data                         |
|                            | n=687                    | n=616                    | n=3,930                  | n=3,522                  | n=4,617                               | n=4,138                               |
|                            | OR <sup>a</sup> (95% CI) | OR <sup>a</sup> (95% CI) | OR <sup>a</sup> (95% CI) | OR <sup>a</sup> (95% CI) | <i>P</i> for interaction <sup>b</sup> | <i>P</i> for interaction <sup>b</sup> |
| Sports activities          | 1.19 (0.79-1.78)         | 1.09 (0.70-1.68)         | <b>1.74 (1.41-2.15)</b>  | <b>1.71 (1.37-2.14)</b>  | 0.312                                 | 0.238                                 |
| Gardening                  | 1.32 (0.86-2.01)         | 1.31 (0.83-2.06)         | 1.06 (0.87-1.29)         | 1.06 (0.86-1.31)         | 0.298                                 | 0.328                                 |
| Musical activities         | 1.07 (0.69-1.66)         | 1.02 (0.64-1.64)         | <b>1.59 (1.29-1.95)</b>  | <b>1.65 (1.33-2.05)</b>  | 0.175                                 | 0.111                                 |
| Creative activities        | 0.82 (0.52-1.30)         | 0.89 (0.54-1.46)         | 0.92 (0.74-1.15)         | 0.94 (0.75-1.18)         | 0.962                                 | 0.933                                 |
| Cultural activities        | 0.98 (0.62-1.53)         | 0.99 (0.61-1.61)         | 0.93 (0.75-1.16)         | 0.96 (0.76-1.20)         | 0.562                                 | 0.701                                 |
| Playing games              | 2.10 (0.67-6.62)         | 2.22 (0.61-8.07)         | 0.82 (0.53-1.28)         | 0.82 (0.51-1.30)         | 0.304                                 | 0.276                                 |
| Sightseeing                | 1.19 (0.75-1.89)         | 1.33 (0.81-2.18)         | 1.03 (0.83-1.29)         | 0.99 (0.78-1.25)         | 0.338                                 | 0.235                                 |
| Art appreciation           | 1.22 (0.78-1.92)         | 1.09 (0.68-1.77)         | 1.03 (0.82-1.29)         | 1.07 (0.84-1.35)         | 0.366                                 | 0.718                                 |
| TV watching                | 1.10 (0.72-1.67)         | 1.06 (0.67-1.67)         | <b>0.69 (0.56-0.85)</b>  | <b>0.71 (0.57-0.88)</b>  | <b>0.043</b>                          | 0.084                                 |
| Cooking                    | 1.37 (0.89-2.12)         | 1.40 (0.88-2.25)         | <b>1.28 (1.03-1.60)</b>  | 1.22 (0.97-1.54)         | 0.566                                 | 0.491                                 |
| Pet ownership              | 0.68 (0.39-1.18)         | 0.53 (0.28-1.01)         | 1.10 (0.84-1.45)         | 1.09 (0.82-1.44)         | 0.198                                 | 0.110                                 |
| Technology usage           | 0.95 (0.60-1.50)         | 0.96 (0.58-1.57)         | 1.13 (0.88-1.44)         | 1.16 (0.90-1.50)         | 0.802                                 | 0.904                                 |
| Investment                 | 1.33 (0.73-2.42)         | 1.65 (0.86-3.16)         | 1.07 (0.78-1.47)         | 0.99 (0.70-1.39)         | 0.527                                 | 0.237                                 |
| Gambling                   | 1.01 (0.46-2.19)         | 0.94 (0.41-2.13)         | 0.70 (0.42-1.16)         | 0.72 (0.43-1.22)         | 0.338                                 | 0.429                                 |

CI, confidence interval; MI, multiple imputation; OR, odds ratio.

Non-participation in each activity was set as the reference group. Results in bold indicate  $P < 0.05$ .

<sup>a</sup>Adjusted for covariates, mental function, and all 14 leisure activity variables.

<sup>b</sup> $P$  for interaction between work status and each type of leisure activities.

**eTable 5.** Comparison between the findings obtained from multiple imputation data and those from complete data, based on the mutual adjustment for all 14 types of leisure activities: stratified analyses by gender

| Type of leisure activities | Men                      |                          | Women                    |                          | All                                   |                                       |
|----------------------------|--------------------------|--------------------------|--------------------------|--------------------------|---------------------------------------|---------------------------------------|
|                            | MI data                  | Complete data            | MI data                  | Complete data            | MI data                               | Complete data                         |
|                            | n=4,044                  | n=3,792                  | n=4,617                  | n=4,138                  | n=8,661                               | n=7,930                               |
|                            | OR <sup>a</sup> (95% CI) | OR <sup>a</sup> (95% CI) | OR <sup>a</sup> (95% CI) | OR <sup>a</sup> (95% CI) | <i>P</i> for interaction <sup>b</sup> | <i>P</i> for interaction <sup>b</sup> |
| Sports activities          | <b>1.38 (1.15-1.67)</b>  | <b>1.37 (1.13-1.67)</b>  | <b>1.60 (1.33-1.92)</b>  | <b>1.55 (1.28-1.88)</b>  | 0.416                                 | 0.471                                 |
| Gardening                  | 0.99 (0.84-1.17)         | 1.00 (0.84-1.19)         | 1.10 (0.92-1.32)         | 1.10 (0.91-1.33)         | 0.534                                 | 0.588                                 |
| Musical activities         | 1.08 (0.88-1.32)         | 1.09 (0.88-1.34)         | <b>1.47 (1.23-1.77)</b>  | <b>1.52 (1.25-1.84)</b>  | <b>0.022</b>                          | <b>0.022</b>                          |
| Creative activities        | 1.19 (0.95-1.50)         | 1.21 (0.95-1.53)         | 0.90 (0.74-1.09)         | 0.93 (0.76-1.14)         | 0.066                                 | 0.095                                 |
| Cultural activities        | 0.93 (0.76-1.16)         | 0.95 (0.77-1.19)         | 0.94 (0.78-1.14)         | 0.96 (0.79-1.18)         | 0.847                                 | 0.812                                 |
| Playing games              | 0.91 (0.75-1.12)         | 0.93 (0.76-1.15)         | 0.89 (0.60-1.35)         | 0.89 (0.58-1.38)         | 0.935                                 | 0.948                                 |
| Sightseeing                | 1.12 (0.93-1.36)         | 1.10 (0.90-1.34)         | 1.06 (0.87-1.30)         | 1.05 (0.85-1.29)         | 0.889                                 | 0.962                                 |
| Art appreciation           | 1.04 (0.85-1.27)         | 1.04 (0.84-1.28)         | 1.06 (0.87-1.30)         | 1.06 (0.86-1.31)         | 0.913                                 | 0.980                                 |
| TV watching                | 0.85 (0.71-1.03)         | 0.86 (0.70-1.04)         | <b>0.76 (0.63-0.91)</b>  | <b>0.77 (0.64-0.94)</b>  | 0.474                                 | 0.533                                 |
| Cooking                    | <b>1.40 (1.05-1.86)</b>  | <b>1.40 (1.04-1.89)</b>  | <b>1.28 (1.05-1.55)</b>  | 1.23 (1.00-1.50)         | 0.689                                 | 0.558                                 |
| Pet ownership              | 0.89 (0.70-1.12)         | 0.89 (0.70-1.14)         | 0.99 (0.77-1.26)         | 0.95 (0.74-1.23)         | 0.621                                 | 0.804                                 |
| Technology usage           | 1.20 (0.99-1.45)         | <b>1.26 (1.04-1.53)</b>  | 1.11 (0.90-1.38)         | 1.14 (0.91-1.42)         | 0.539                                 | 0.511                                 |
| Investment                 | 0.97 (0.78-1.20)         | 0.92 (0.73-1.14)         | 1.10 (0.84-1.46)         | 1.07 (0.80-1.44)         | 0.390                                 | 0.377                                 |
| Gambling                   | 0.84 (0.67-1.05)         | 0.83 (0.66-1.05)         | 0.78 (0.52-1.19)         | 0.79 (0.51-1.21)         | 0.932                                 | 0.989                                 |

CI, confidence interval; MI, multiple imputation; OR, odds ratio.

Non-participation in each activity was set as the reference group. Results in bold indicate  $P < 0.05$ .

<sup>a</sup>Adjusted for covariates, mental function, work status, and all 14 leisure activity variables

<sup>b</sup> $P$  for interaction between gender and each type of leisure activities.
